# Supplementary material for: π-Aromatic Bi5– – The Heaviest Analogue of Cyclopentadienide (C5H5)– Finally Captured in the Mixed-Valent Compound [{IMesCo}2(μ,η5:η5-Bi5)]
Source: Research Square preprint supplement (doi:10.21203/rs.3.rs-4622749/v1), 2024-07-11

## checkCIF/PLATON report

Structure factors have been supplied for datablock(s) 1

THIS REPORT IS FOR GUIDANCE ONLY. IF USED AS PART OF A REVIEW PROCEDURE FOR PUBLICATION, IT SHOULD NOT REPLACE THE EXPERTISE OF AN EXPERIENCED CRYSTALLOGRAPHIC REFEREE.

No syntax errors found. CIF dictionary Interpreting this report

## Datablock: 1

|                 |                |                    |             |  |
|-----------------|----------------|--------------------|-------------|--|
| Bond precision: | C-C = 0.0041 A | Wavelength=0.71073 |             |  |
| Cell:           | a=17.1783(12)  | b=15.058(3)        | c=17.048(4) |  |
|                 | alpha=90       | beta=90            | gamma=90    |  |
| Temperature:    | 100 K          |                    |             |  |

|                        | Calculated         | Reported           |
|------------------------|--------------------|--------------------|
| Volume                 | 4409.8(14)         | 4409.7(14)         |
| Space group            | P c c n            | P c c n            |
| Hall group             | -P 2ab 2ac         | -P 2ab 2ac         |
| Moiety formula         | C42 H48 Bi5 Co2 N4 | C42 H48 Bi5 Co2 N4 |
| Sum formula            | C42 H48 Bi5 Co2 N4 | C42 H48 Bi5 Co2 N4 |
| Mr                     | 1771.60            | 1771.60            |
| Dx, g cm <sup>-3</sup> | 2.668              | 2.668              |
| Z                      | 4                  | 4                  |
| Mu (mm <sup>-1</sup> ) | 20.646             | 20.646             |
| F000                   | 3188.0             | 3188.0             |
| F000'                  | 3115.38            |                    |
| h, k, lmax             | 26, 23, 26         | 26, 23, 25         |
| Nref                   | 8407               | 8349               |
| Tmin, Tmax             | 0.097, 0.356       | 0.035, 0.108       |
| Tmin'                  | 0.001              |                    |

Correction method= # Reported T Limits: Tmin=0.035 Tmax=0.108  
AbsCorr = MULTI-SCAN

Data completeness= 0.993                      Theta (max)= 33.129

|                               |                                 |
|-------------------------------|---------------------------------|
| R(reflections)= 0.0269( 7137) | wR2(reflections)= 0.0574( 8349) |
| S = 1.065                     | Npar= 246                       |

---

The following ALERTS were generated. Each ALERT has the format

**test-name\_ALERT\_alert-type\_alert-level.**

Click on the hyperlinks for more details of the test.

---

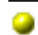

### Alert level C

|                   |                                                 |       |        |
|-------------------|-------------------------------------------------|-------|--------|
| PLAT906_ALERT_3_C | Large K Value in the Analysis of Variance ..... | 3.309 | Check  |
| PLAT911_ALERT_3_C | Missing FCF Refl Between Thmin & STh/L= 0.600   | 5     | Report |
|                   | 0 2 0, 2 0 0, 0 0 2, 0 1 2, 0 0 6,              |       |        |
| PLAT971_ALERT_2_C | Check Calcd Resid. Dens. 0.57Ang From Bi2       | 1.75  | eA-3   |
| PLAT972_ALERT_2_C | Check Calcd Resid. Dens. 0.57Ang From Bi2       | -1.75 | eA-3   |
| PLAT972_ALERT_2_C | Check Calcd Resid. Dens. 0.49Ang From Bi2       | -1.68 | eA-3   |
| PLAT972_ALERT_2_C | Check Calcd Resid. Dens. 0.77Ang From Bi1       | -1.65 | eA-3   |
| PLAT972_ALERT_2_C | Check Calcd Resid. Dens. 0.71Ang From Bi3       | -1.61 | eA-3   |
| PLAT977_ALERT_2_C | Check Negative Difference Density on H6B .      | -0.38 | eA-3   |
| PLAT977_ALERT_2_C | Check Negative Difference Density on H12B .     | -0.35 | eA-3   |
| PLAT977_ALERT_2_C | Check Negative Difference Density on H15A .     | -0.39 | eA-3   |
| PLAT977_ALERT_2_C | Check Negative Difference Density on H21A .     | -0.64 | eA-3   |

---

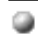

### Alert level G

|                   |                                                                   |      |              |
|-------------------|-------------------------------------------------------------------|------|--------------|
| PLAT720_ALERT_4_G | Number of Unusual/Non-Standard Labels .....                       | 4    | Note         |
|                   | C00R H00A H00B H00C                                               |      |              |
| PLAT910_ALERT_3_G | Missing # of FCF Reflection(s) Below Theta(Min).<br>1 1 0,        | 1    | Note         |
| PLAT912_ALERT_4_G | Missing # of FCF Reflections Above STh/L= 0.600                   | 41   | Note         |
| PLAT913_ALERT_3_G | Missing # of Very Strong Reflections in FCF ....<br>1 1 0, 2 0 0, | 2    | Note         |
| PLAT941_ALERT_3_G | Average HKL Measurement Multiplicity .....                        | 3.5  | Low          |
| PLAT961_ALERT_5_G | Dataset Contains no Negative Intensities .....                    |      | Please Check |
| PLAT969_ALERT_5_G | The 'Henn et al.' R-Factor-gap value .....                        | 1.62 | Note         |
|                   | Predicted wR2: Based on SigI**2 3.53 or SHELX Weight              | 5.46 |              |
| PLAT978_ALERT_2_G | Number C-C Bonds with Positive Residual Density.                  | 0    | Info         |

---

- 0 **ALERT level A** = Most likely a serious problem - resolve or explain  
0 **ALERT level B** = A potentially serious problem, consider carefully  
11 **ALERT level C** = Check. Ensure it is not caused by an omission or oversight  
8 **ALERT level G** = General information/check it is not something unexpected
- 0 ALERT type 1 CIF construction/syntax error, inconsistent or missing data  
10 ALERT type 2 Indicator that the structure model may be wrong or deficient  
5 ALERT type 3 Indicator that the structure quality may be low  
2 ALERT type 4 Improvement, methodology, query or suggestion  
2 ALERT type 5 Informative message, check
- 
-

It is advisable to attempt to resolve as many as possible of the alerts in all categories. Often the minor alerts point to easily fixed oversights, errors and omissions in your CIF or refinement strategy, so attention to these fine details can be worthwhile. In order to resolve some of the more serious problems it may be necessary to carry out additional measurements or structure refinements. However, the purpose of your study may justify the reported deviations and the more serious of these should normally be commented upon in the discussion or experimental section of a paper or in the "special\_details" fields of the CIF. checkCIF was carefully designed to identify outliers and unusual parameters, but every test has its limitations and alerts that are not important in a particular case may appear. Conversely, the absence of alerts does not guarantee there are no aspects of the results needing attention. It is up to the individual to critically assess their own results and, if necessary, seek expert advice.

### **Publication of your CIF in IUCr journals**

A basic structural check has been run on your CIF. These basic checks will be run on all CIFs submitted for publication in IUCr journals (*Acta Crystallographica*, *Journal of Applied Crystallography*, *Journal of Synchrotron Radiation*); however, if you intend to submit to *Acta Crystallographica Section C* or *E* or *IUCrData*, you should make sure that full publication checks are run on the final version of your CIF prior to submission.

### **Publication of your CIF in other journals**

Please refer to the *Notes for Authors* of the relevant journal for any special instructions relating to CIF submission.

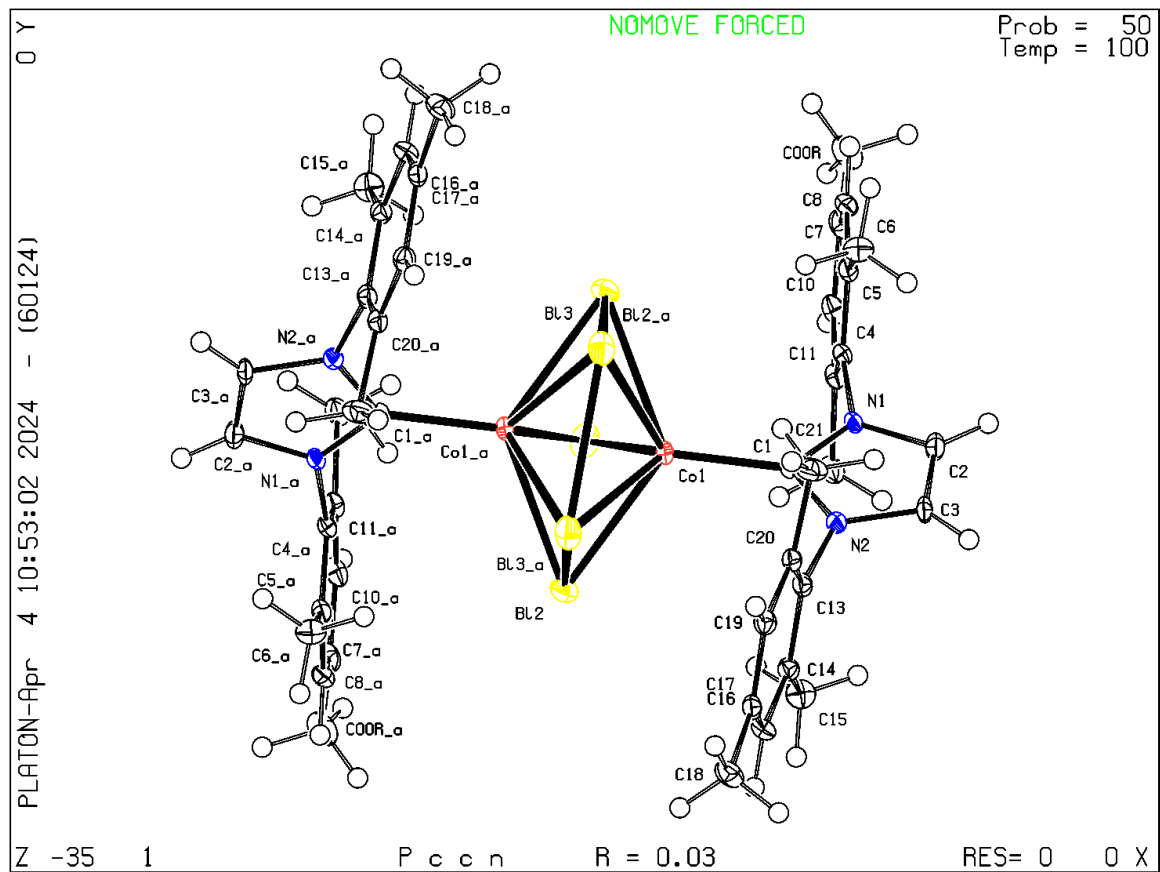

Supplement: Supplementary file 1 [file 18990eec853e8c1a0167d74e.pdf]
